# Supplementary material
Source: ML conference proceedings conference paper supplement (https://openreview.net/forum?id=FNMbe2vLvev)

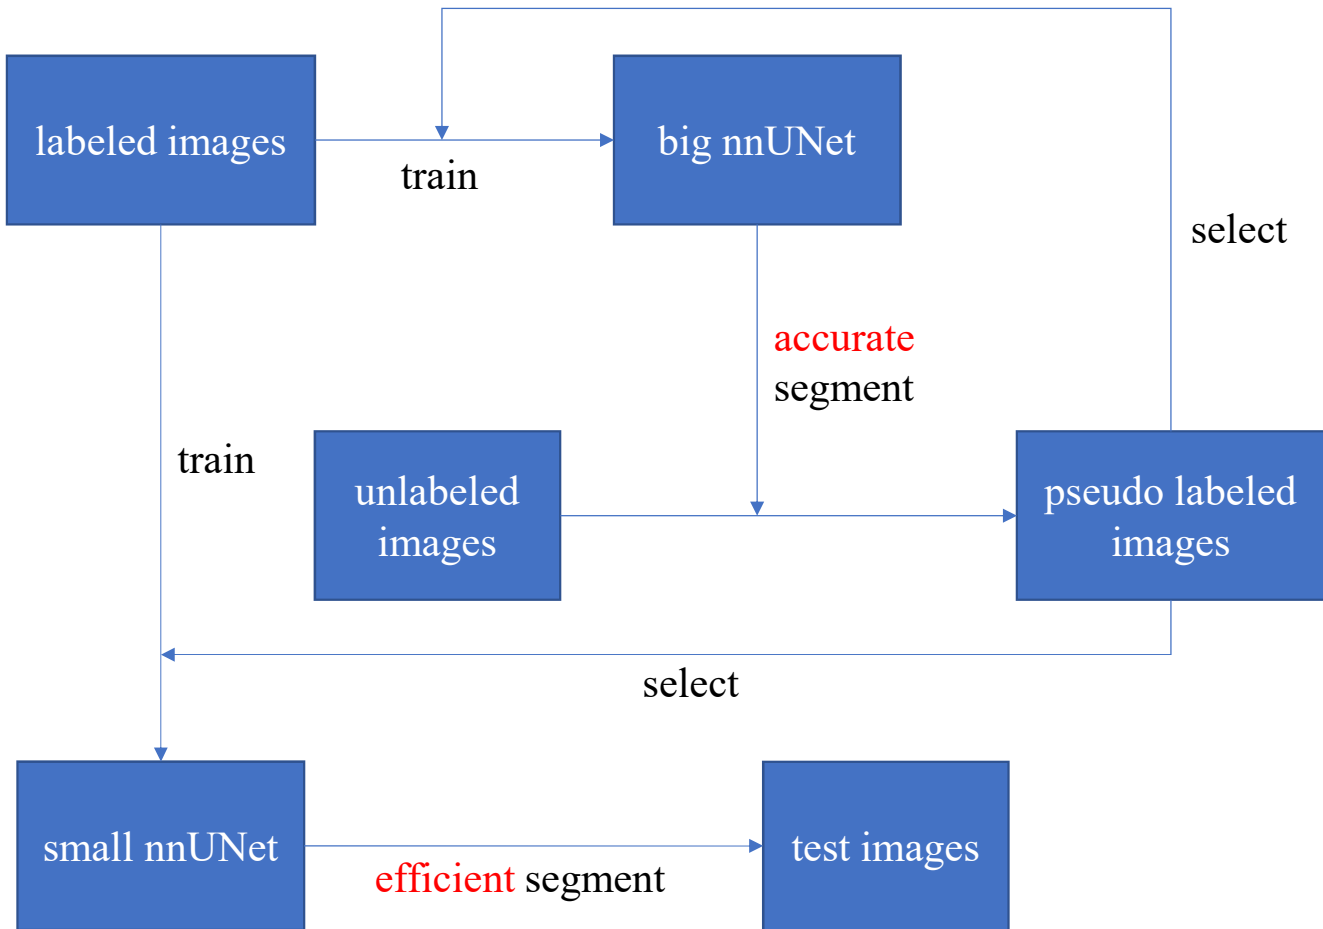

Supplement: supplementary_material [file attachment]

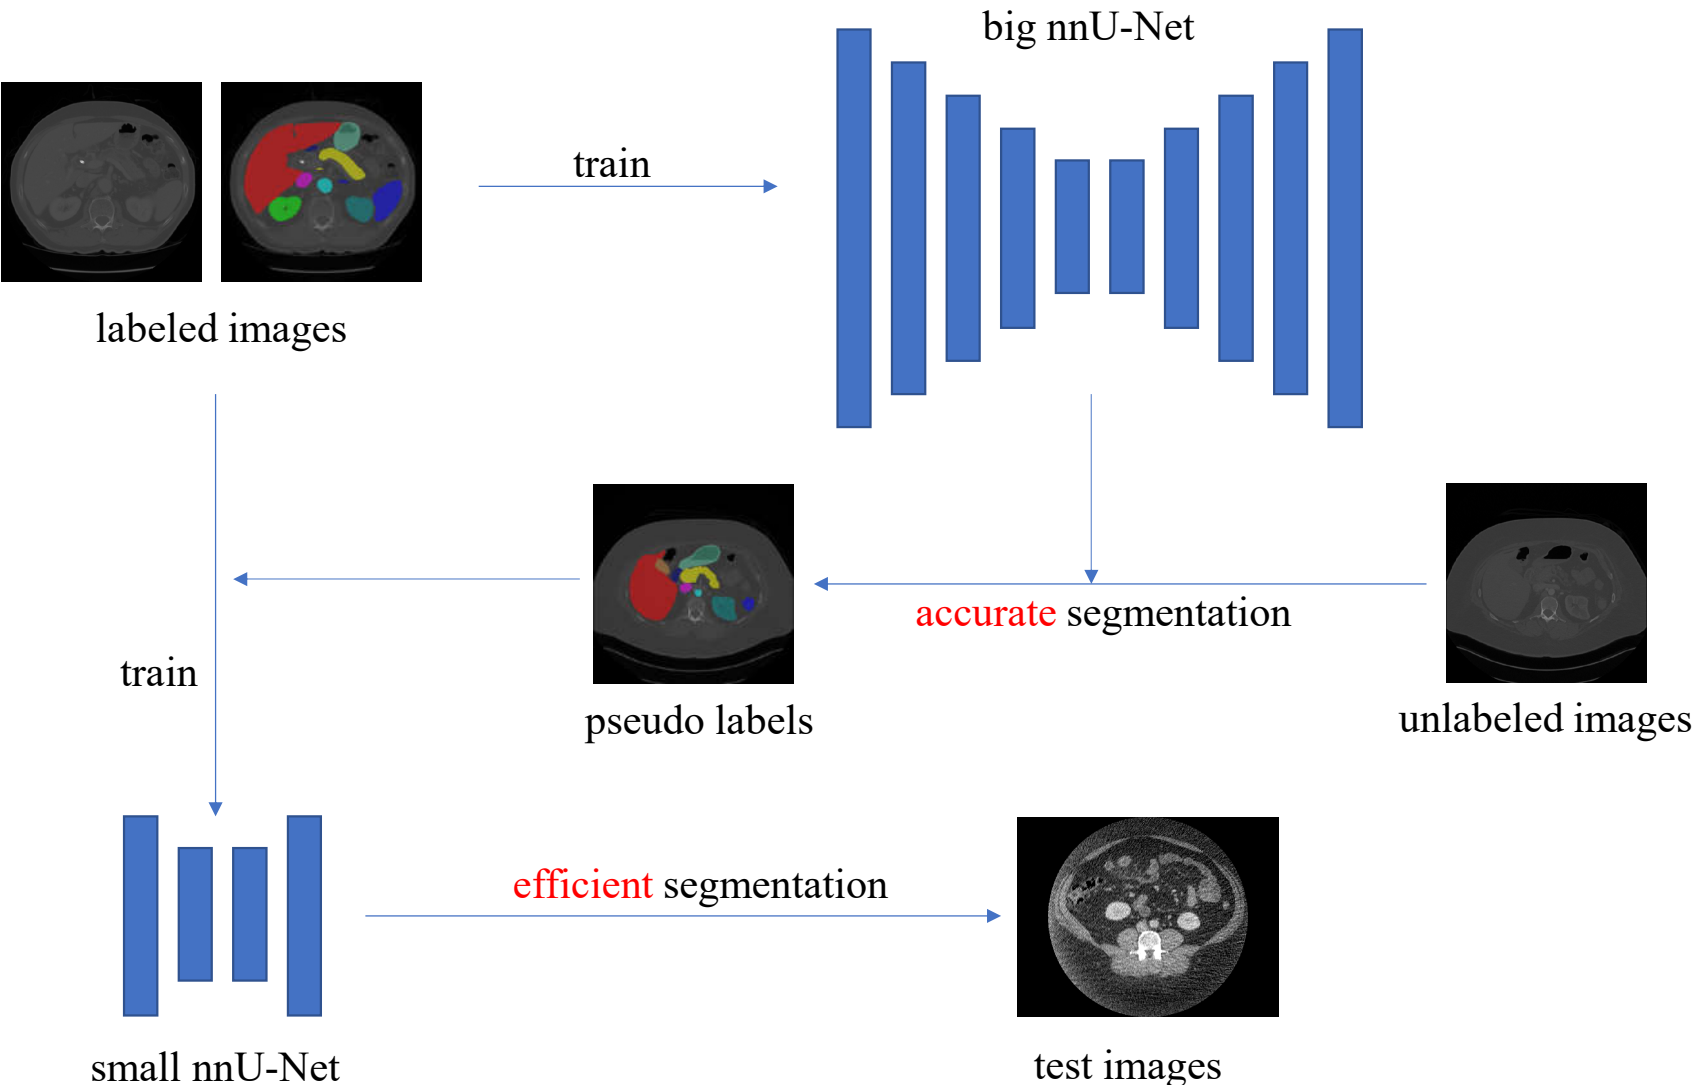

Supplement: supplementary_material [file attachment]

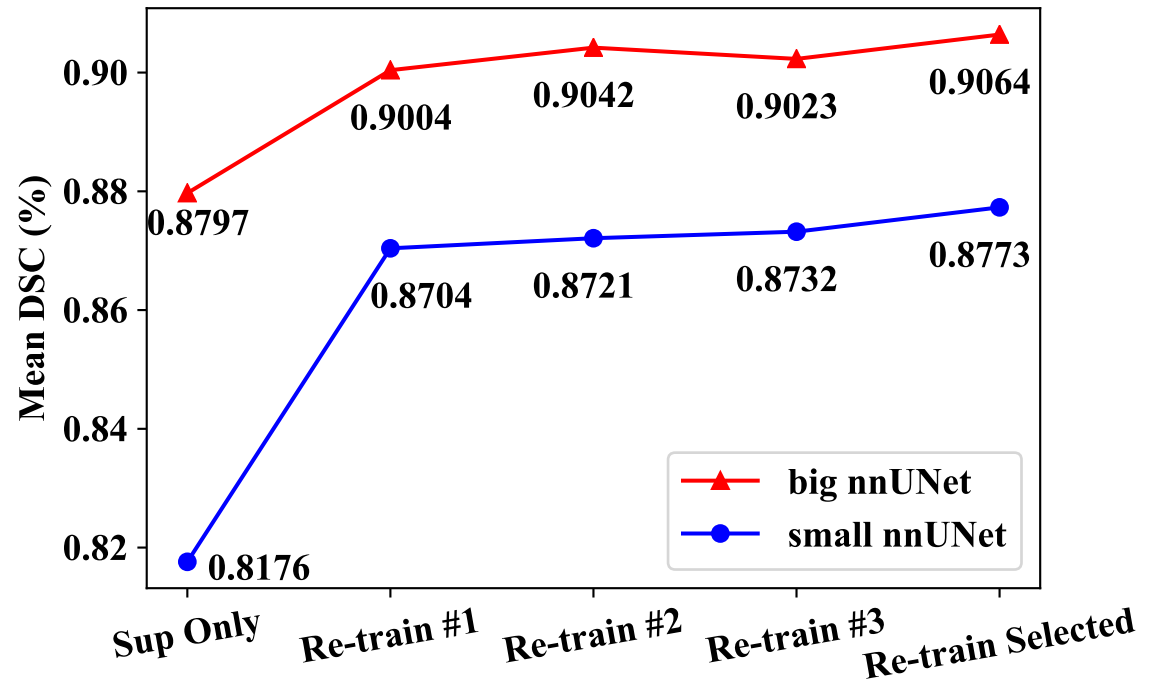

Supplement: supplementary_material [file attachment]

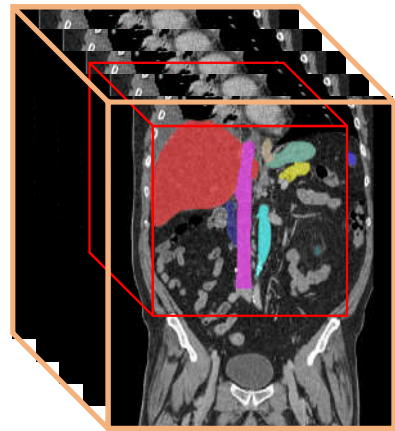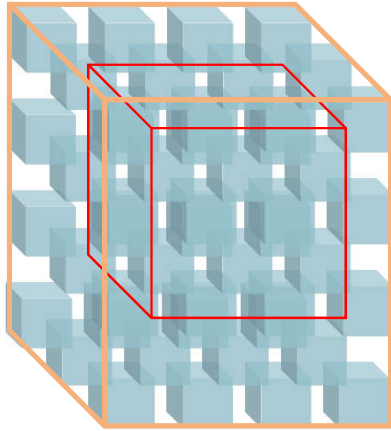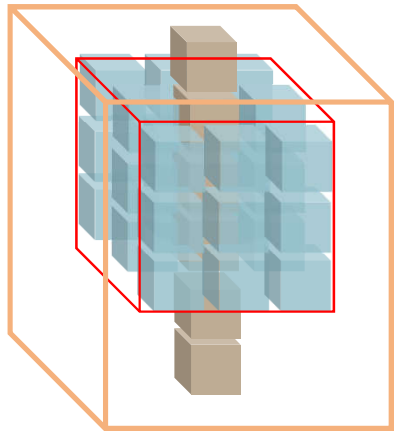

Supplement: supplementary_material [file attachment]

Case #21

DSC:0.9424 NSD:0.9922

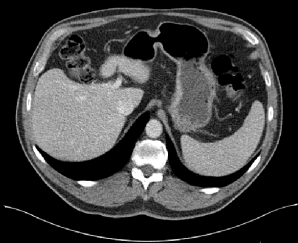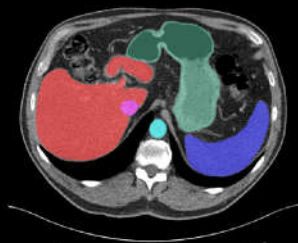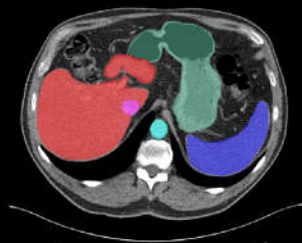

Case #35

DSC:0.9274 NSD:0.9933

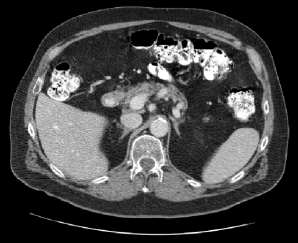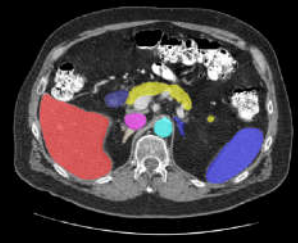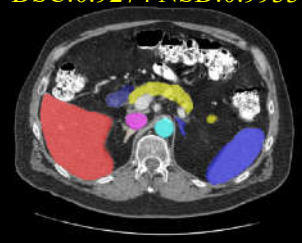

Case #42

DSC:0.7994 NSD:0.8707

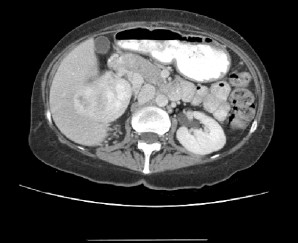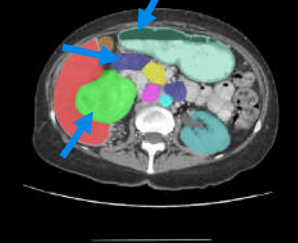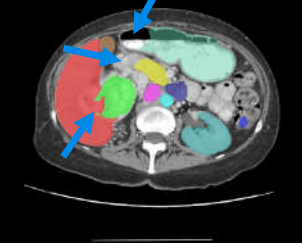

Case #48

DSC:0.7345 NSD:0.7657

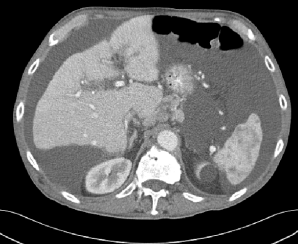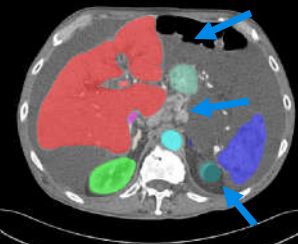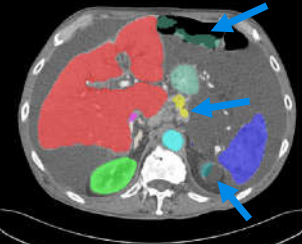

(a) Image

(b) Ground Truth

(c) Segmentation

Supplement: supplementary_material [file attachment]
